# Supplementary material for: Dairy Product Consumption and Prostate Cancer Risk in the United States
Source: MDPI journal article supplement (doi:10.3390/nu11071615), 2019-07-16
Supplement: s1 [file s1]

**Supplementary Table 1. Dairy product items included in dairy product subgroups**

| Subgroups                  | Dairy product items                                                                                                                                                   |
|----------------------------|-----------------------------------------------------------------------------------------------------------------------------------------------------------------------|
| Regular-fat dairy products | Whole milk, sour cream, ice cream, several cheeses, and regular butter.                                                                                               |
| Low-fat dairy products     | Nonfat/skim/low-fat milk, low-fat sour cream, nonfat/low-fat cream cheese, nonfat/low-fat cheese, low-fat ice cream or frozen yogurt, yogurt, and reduced-fat butter. |
| Fermented products         | Yogurt, several cheeses, and sour cream.                                                                                                                              |
| Non-fermented products     | Milk, cream, ice cream and butter.                                                                                                                                    |

**Supplementary Table 2. Risk of prostate cancer by quartiles of dairy product intakes stratified by the clinical stage of prostate cancer\***

|                              | Quartiles   | Cases | HR   | 95% CI     | <i>P</i> -trend |
|------------------------------|-------------|-------|------|------------|-----------------|
| Early stage (Stage I/II)     |             |       |      |            |                 |
| Total dairy products         | 1 (lowest)  | 874   |      | Reference  |                 |
| (g/1000 kcal)                | 2           | 937   | 1.06 | 0.96, 1.16 |                 |
|                              | 3           | 952   | 1.05 | 0.95, 1.15 |                 |
|                              | 4 (highest) | 963   | 1.04 | 0.94, 1.14 | 0.75            |
| Low-fat dairy products       | 1           | 847   |      | Reference  |                 |
| (g/1000 kcal)                | 2           | 947   | 1.09 | 0.99, 1.20 |                 |
|                              | 3           | 965   | 1.10 | 0.99, 1.20 |                 |
|                              | 4           | 967   | 1.08 | 0.98, 1.19 | 0.35            |
| Regular-fat dairy products   | 1           | 888   |      | Reference  |                 |
| (g/1000 kcal)                | 2           | 984   | 1.11 | 1.01, 1.21 |                 |
|                              | 3           | 934   | 1.04 | 0.95, 1.15 |                 |
|                              | 4           | 920   | 1.02 | 0.93, 1.12 | 0.54            |
| Fermented dairy products     | 1           | 909   |      | Reference  |                 |
| (g/1000 kcal)                | 2           | 941   | 1.00 | 0.92, 1.10 |                 |
|                              | 3           | 916   | 0.97 | 0.88, 1.06 |                 |
|                              | 4           | 960   | 1.01 | 0.92, 1.11 | 0.83            |
| Non-fermented dairy products | 1           | 885   |      | Reference  |                 |
| (g/1000 kcal)                | 2           | 887   | 1.00 | 0.91, 1.10 |                 |
|                              | 3           | 978   | 1.08 | 0.98, 1.18 |                 |
|                              | 4           | 976   | 1.05 | 0.95, 1.15 | 0.28            |
| Late stage (III/IV)          |             |       |      |            |                 |
| Total dairy products         | 1           | 86    |      | Reference  |                 |
|                              | 2           | 97    | 1.15 | 0.86, 1.54 |                 |
| (g/1000 kcal)                | 3           | 116   | 1.36 | 1.03, 1.81 |                 |
|                              | 4           | 108   | 1.24 | 0.93, 1.66 | 0.20            |
| Low-fat dairy products       | 1           | 101   |      | Reference  |                 |
| (g/1000 kcal)                | 2           | 94    | 0.92 | 0.69, 1.22 |                 |
|                              | 3           | 109   | 1.07 | 0.81, 1.41 |                 |
|                              | 4           | 103   | 0.99 | 0.75, 1.32 | 0.86            |
| Regular-fat dairy products   | 1           | 87    |      | Reference  |                 |
| (g/1000 kcal)                | 2           | 100   | 1.12 | 0.84, 1.49 |                 |
|                              | 3           | 98    | 1.09 | 0.82, 1.46 |                 |

|                              |   |     |      |            |      |
|------------------------------|---|-----|------|------------|------|
|                              | 4 | 122 | 1.37 | 1.04, 1.82 | 0.02 |
| Fermented dairy products     | 1 | 90  |      | Reference  |      |
| (g/1000 kcal)                | 2 | 111 | 1.19 | 0.90, 1.58 |      |
|                              | 3 | 106 | 1.11 | 0.84, 1.48 |      |
|                              | 4 | 100 | 1.05 | 0.78, 1.40 | 0.78 |
| Non-fermented dairy products | 1 | 86  |      | Reference  |      |
| (g/1000 kcal)                | 2 | 106 | 1.26 | 0.95, 1.68 |      |
|                              | 3 | 103 | 1.22 | 0.91, 1.63 |      |
|                              | 4 | 112 | 1.29 | 0.97, 1.73 | 0.19 |

\*Adjusted for age, race, PLCO study center, PLCO trial arm, frequency of prostate cancer screening during the follow-up period, maximum PSA level during follow-up period, and family history of any cancer.

**Supplementary Table 3. Risk of prostate cancer by quartiles of dairy product intakes stratified by Gleason score\***

|                                               | Quartiles   | Cases | HR   | 95% CI     | <i>P</i> -trend |
|-----------------------------------------------|-------------|-------|------|------------|-----------------|
| Low Gleason score (<7)                        |             |       |      |            |                 |
| Total dairy products<br>(g/1000 kcal)         | 1 (lowest)  | 486   |      | Reference  |                 |
|                                               | 2           | 539   | 1.09 | 0.96, 1.23 |                 |
|                                               | 3           | 563   | 1.10 | 0.98, 1.25 |                 |
|                                               | 4 (highest) | 576   | 1.10 | 0.97, 1.24 | 0.26            |
| Low-fat dairy products<br>(g/1000 kcal)       | 1           | 477   |      | Reference  |                 |
|                                               | 2           | 539   | 1.10 | 0.97, 1.24 |                 |
|                                               | 3           | 569   | 1.13 | 1.00, 1.28 |                 |
|                                               | 4           | 579   | 1.13 | 0.99, 1.28 | 0.13            |
| Regular-fat dairy products<br>(g/1000 kcal)   | 1           | 501   |      | Reference  |                 |
|                                               | 2           | 589   | 1.15 | 1.02, 1.30 |                 |
|                                               | 3           | 549   | 1.07 | 0.95, 1.21 |                 |
|                                               | 4           | 525   | 1.02 | 0.90, 1.15 | 0.43            |
| Fermented dairy products<br>(g/1000 kcal)     | 1           | 506   |      | Reference  |                 |
|                                               | 2           | 547   | 1.03 | 0.91, 1.16 |                 |
|                                               | 3           | 553   | 1.02 | 0.91, 1.16 |                 |
|                                               | 4           | 558   | 1.02 | 0.91, 1.16 | 0.85            |
| Non-fermented dairy products<br>(g/1000 kcal) | 1           | 494   |      | Reference  |                 |
|                                               | 2           | 511   | 1.03 | 0.91, 1.17 |                 |
|                                               | 3           | 580   | 1.14 | 1.01, 1.29 |                 |
|                                               | 4           | 579   | 1.10 | 0.97, 1.24 | 0.13            |
| High Gleason score (≥7)                       |             |       |      |            |                 |
| Total dairy products<br>(g/1000 kcal)         | 1           | 466   |      | Reference  |                 |
|                                               | 2           | 484   | 1.04 | 0.91, 1.18 |                 |
|                                               | 3           | 495   | 1.04 | 0.92, 1.19 |                 |
|                                               | 4           | 483   | 1.00 | 0.88, 1.14 | 0.88            |
| Low-fat dairy products<br>(g/1000 kcal)       | 1           | 458   |      | Reference  |                 |
|                                               | 2           | 493   | 1.07 | 0.94, 1.21 |                 |
|                                               | 3           | 496   | 1.06 | 0.93, 1.21 |                 |
|                                               | 4           | 481   | 1.02 | 0.89, 1.16 | 0.93            |
| Regular-fat dairy products<br>(g/1000 kcal)   | 1           | 463   |      | Reference  |                 |
|                                               | 2           | 492   | 1.08 | 0.95, 1.22 |                 |
|                                               | 3           | 477   | 1.04 | 0.91, 1.18 |                 |

|                              |   |     |      |            |      |
|------------------------------|---|-----|------|------------|------|
|                              | 4 | 496 | 1.07 | 0.94, 1.21 | 0.53 |
| Fermented dairy products     | 1 | 480 |      | Reference  |      |
| (g/1000 kcal)                | 2 | 495 | 1.02 | 0.90, 1.16 |      |
|                              | 3 | 457 | 0.94 | 0.82, 1.07 |      |
|                              | 4 | 496 | 1.01 | 0.89, 1.15 | 0.86 |
| Non-fermented dairy products | 1 | 471 |      | Reference  |      |
| (g/1000 kcal)                | 2 | 469 | 0.99 | 0.88, 1.13 |      |
|                              | 3 | 492 | 1.04 | 0.91, 1.18 |      |
|                              | 4 | 496 | 1.03 | 0.90, 1.17 | 0.64 |

\*Adjusted for age, race, PLCO study center, PLCO trial arm, frequency of prostate cancer screening during the follow-up period, maximum PSA level during follow-up period, and family history of any cancer.
